# Supplementary material
Source: PubMed Central journal article supplement (PMC3978599)

**Supplemental Figures**

**Figure S1. Intervention and data collection schedule.** CBC with differential was drawn on days 0, 4, and 8 of each vaccine cycle. Vaccine #1 started 8 weeks after surgery. Vaccines #2, #3, and #4 were given on weeks 40, 44, and 48 after the completion of adjuvant therapy.

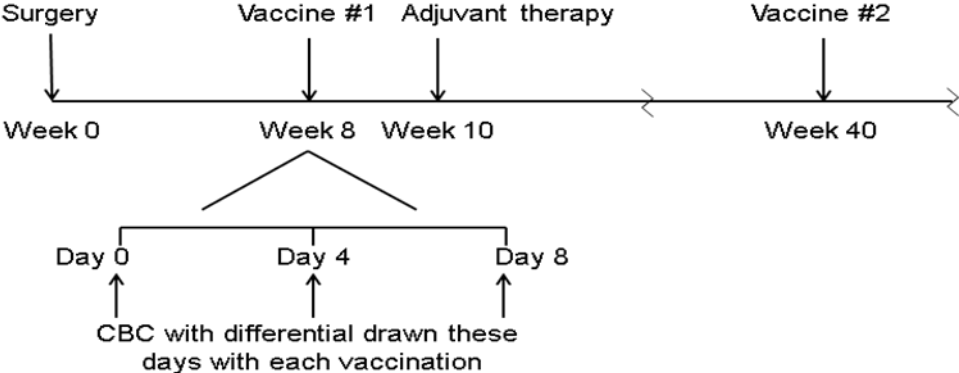

**Figure S2. Participant flow through the trial.**

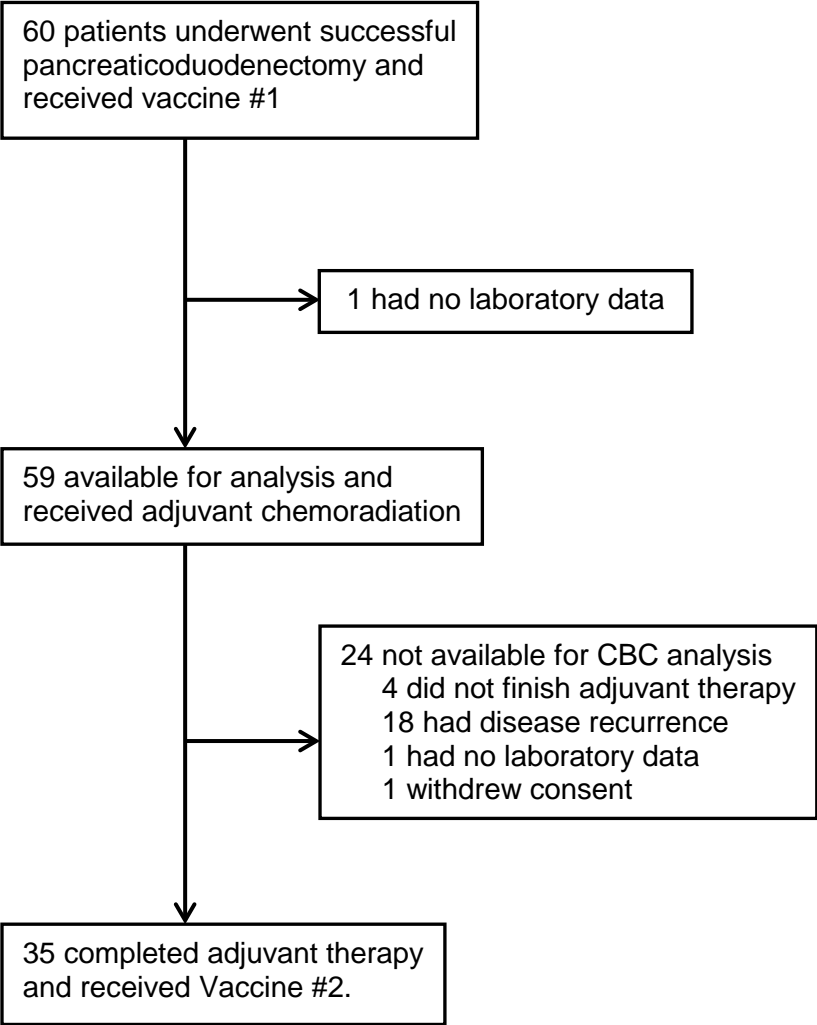

**Figure S3. Eosinophil counts over time.** Total eosinophil counts were obtained on each patient just prior to each vaccination, on day 4 after vaccination, and/or on day 8 after vaccination. Below depicts the average eosinophil counts for all patients at all time points. With each vaccination, total eosinophil count increased. Error bars represent the 95% confidence interval.

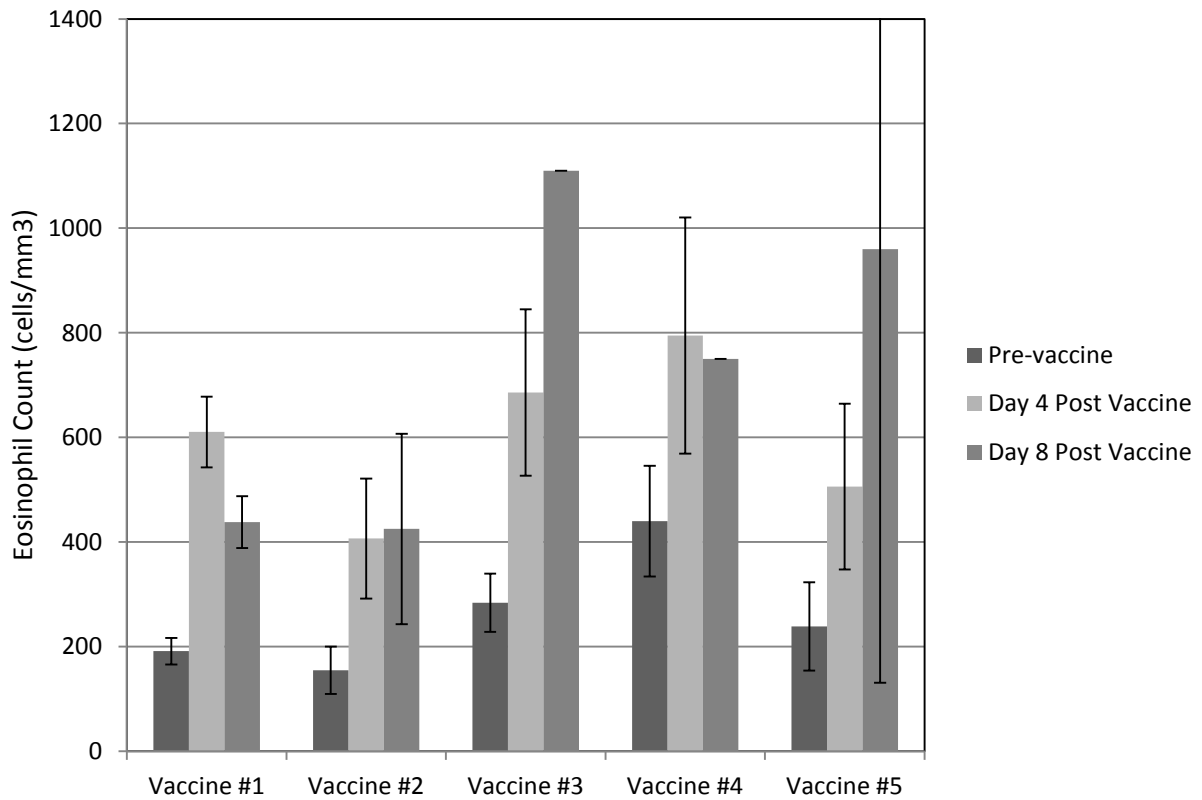

Supplement: NIHMS562872-supplement-Supplemental_Figures.pdf [file NIHMS562872-supplement-Supplemental_Figures.pdf]
